# Supplementary material
Source: Springer Nature journal article supplement (https://www.springermedizin.de/resource/supplementary/12889_2009_2265_MOESM2_ESM.pdf/9485190)
Supplement: MOESM2 [file 9485190]

### **TBAs advantages**

TBAs endorsement may ↓ fear of nevirapine  
↑ access for women to CT services  
Willingness of TBAs to be involved  
Local access to nevirapine ↑ coverage  
↓ hospital workload

### **TBAs Constraints**

Training required  
May ↑ stigma  
Illiteracy of some TBAs  
Issues of confidentiality  
Full coverage would not be achieved

### **Grandmothers advantages**

May ↓ stigma  
Strong influence on women  
Could remind women to swallow nevirapine

### **Grandmothers constraints**

Requires disclosure  
Lack of knowledge

### **Husbands advantages**

May ↓ stigma  
Strong influence on women  
Couple counselling increases adherence  
Could remind women to swallow nevirapine  
Possible antiretroviral treatment entry point for men

### **Husbands constraints**

Traditions  
Men's fear of HIV testing  
Requires disclosure  
Lack of knowledge

**Pregnant women and baby**
